# Supplementary material
Source: MDPI journal article supplement (https://www.mdpi.com/2077-0472/10/9/412)
Supplement: s1 [file s1]

Article

**Table S1.** Mean monthly air temperature (°C) in the years of the experiment at two sites (Bałdy and Obory) and average temperatures in the growing seasons (IV-X) and throughout the whole year.

| **Bałdy** | **I** | **II** | **III** | **IV** | **V** | **VI** | **VII** | **VIII** | **IX** | **X** | **XI** | **XII** | **Mean IV-X** | **Mean I-XII** |
| --- | --- | --- | --- | --- | --- | --- | --- | --- | --- | --- | --- | --- | --- | --- |
| 2013 | -4.5 | -1.1 | -3.5 | 5.9 | 14.8 | 17.5 | 18 | 17.4 | 11.3 | 8.9 | 5 | 2.2 | 13.4 | 7.7 |
| 2014 | -3.7 | 1.2 | 5.1 | 8.8 | 12.9 | 14.4 | 20.4 | 17.3 | 13.6 | 8.8 | 3.7 | -0.3 | 13.7 | 8.5 |
| 2015 | 0.4 | 0.5 | 4.2 | 6.7 | 11.8 | 15.5 | 17.5 | 19.8 | 13.5 | 6.1 | 4.8 | 3.4 | 13.0 | 8.7 |
| 2016 | -4 | 2.3 | 3 | 7.4 | 13.7 | 17.1 | 18.1 | 17.1 | 13.6 | 6.1 | 2.4 | 0.8 | 13.3 | 8.1 |
| 2017 | -3.4 | -1.4 | 4 | 5.7 | 12.1 | 15.7 | 16.8 | 17.4 | 12.8 | 8.7 | 3.9 | 1.8 | 12.7 | 7.8 |
| 2018 | -0.2 | -4.4 | -0.7 | 11.6 | 17.5 | 18.5 | 20.5 | 19.5 | 14.7 | 8.7 | 3.8 | 1 | 15.9 | 9.2 |
| Mean2013-2018 | -2.6 | -0.5 | 2 | 7.7 | 13.8 | 16.5 | 18.6 | 18.1 | 13.3 | 7.9 | 3.9 | 1.5 | 13.7 | 8.3 |
| Obory |  |  |  |  |  |  |  |  |  |  |  |  |  |  |
| 2013 | -3.9 | -0.1 | -3.6 | 6.5 | 14.4 | 17.2 | 18.2 | 18.1 | 11.4 | 8.9 | 4.9 | 2.4 | 13.5 | 7.9 |
| 2014 | -3.4 | 1.6 | 5.1 | 9.5 | 12.7 | 15.1 | 20.9 | 17.4 | 14.1 | 9.1 | 4.2 | -0.1 | 14.1 | 8.9 |
| 2015 | 1.8 | 1.4 | 5.5 | 8.0 | 12.3 | 15.7 | 18.1 | 20.8 | 14.6 | 7.5 | 6.4 | 4.8 | 13.9 | 9.7 |
| 2016 | -2.6 | 3.4 | 4.3 | 8.9 | 15.1 | 18.0 | 18.8 | 17.9 | 15.6 | 7.8 | 3.8 | 2.6 | 14.6 | 9.5 |
| 2017 | -1.8 | -0.2 | 5.5 | 5.1 | 12.8 | 16.3 | 17.1 | 18.0 | 13.6 | 10.0 | 4.7 | 2.1 | 13.3 | 8.6 |
| 2018 | 0.4 | -3.8 | -0.1 | 11.6 | 16.3 | 17.7 | 20.0 | 20.2 | 15.6 | 10.3 | 4.5 | 1.7 | 16.0 | 9.5 |
| Mean 2013-2018 | -1.6 | 0.4 | 2.8 | 8.3 | 13.9 | 16.7 | 18.9 | 18.7 | 14.2 | 8.9 | 4.8 | 2.3 | 14.2 | 9.0 |


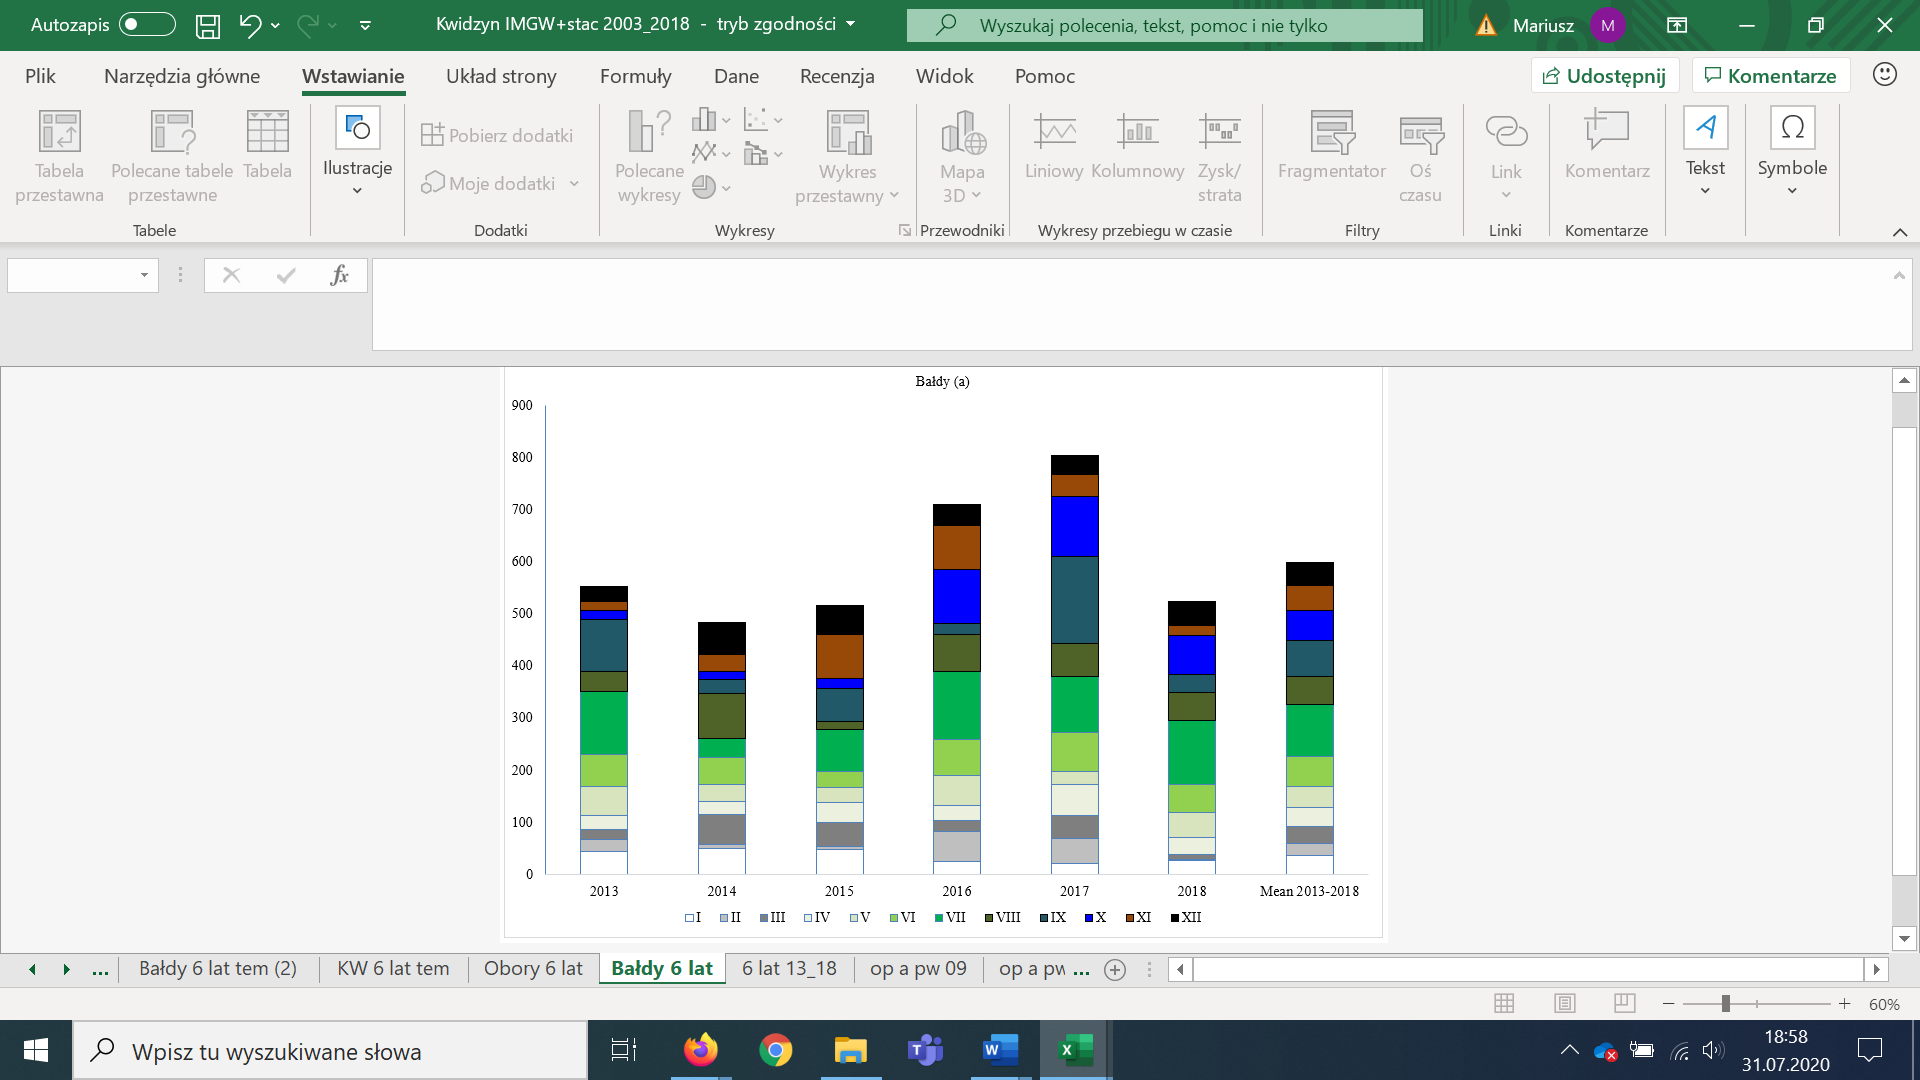


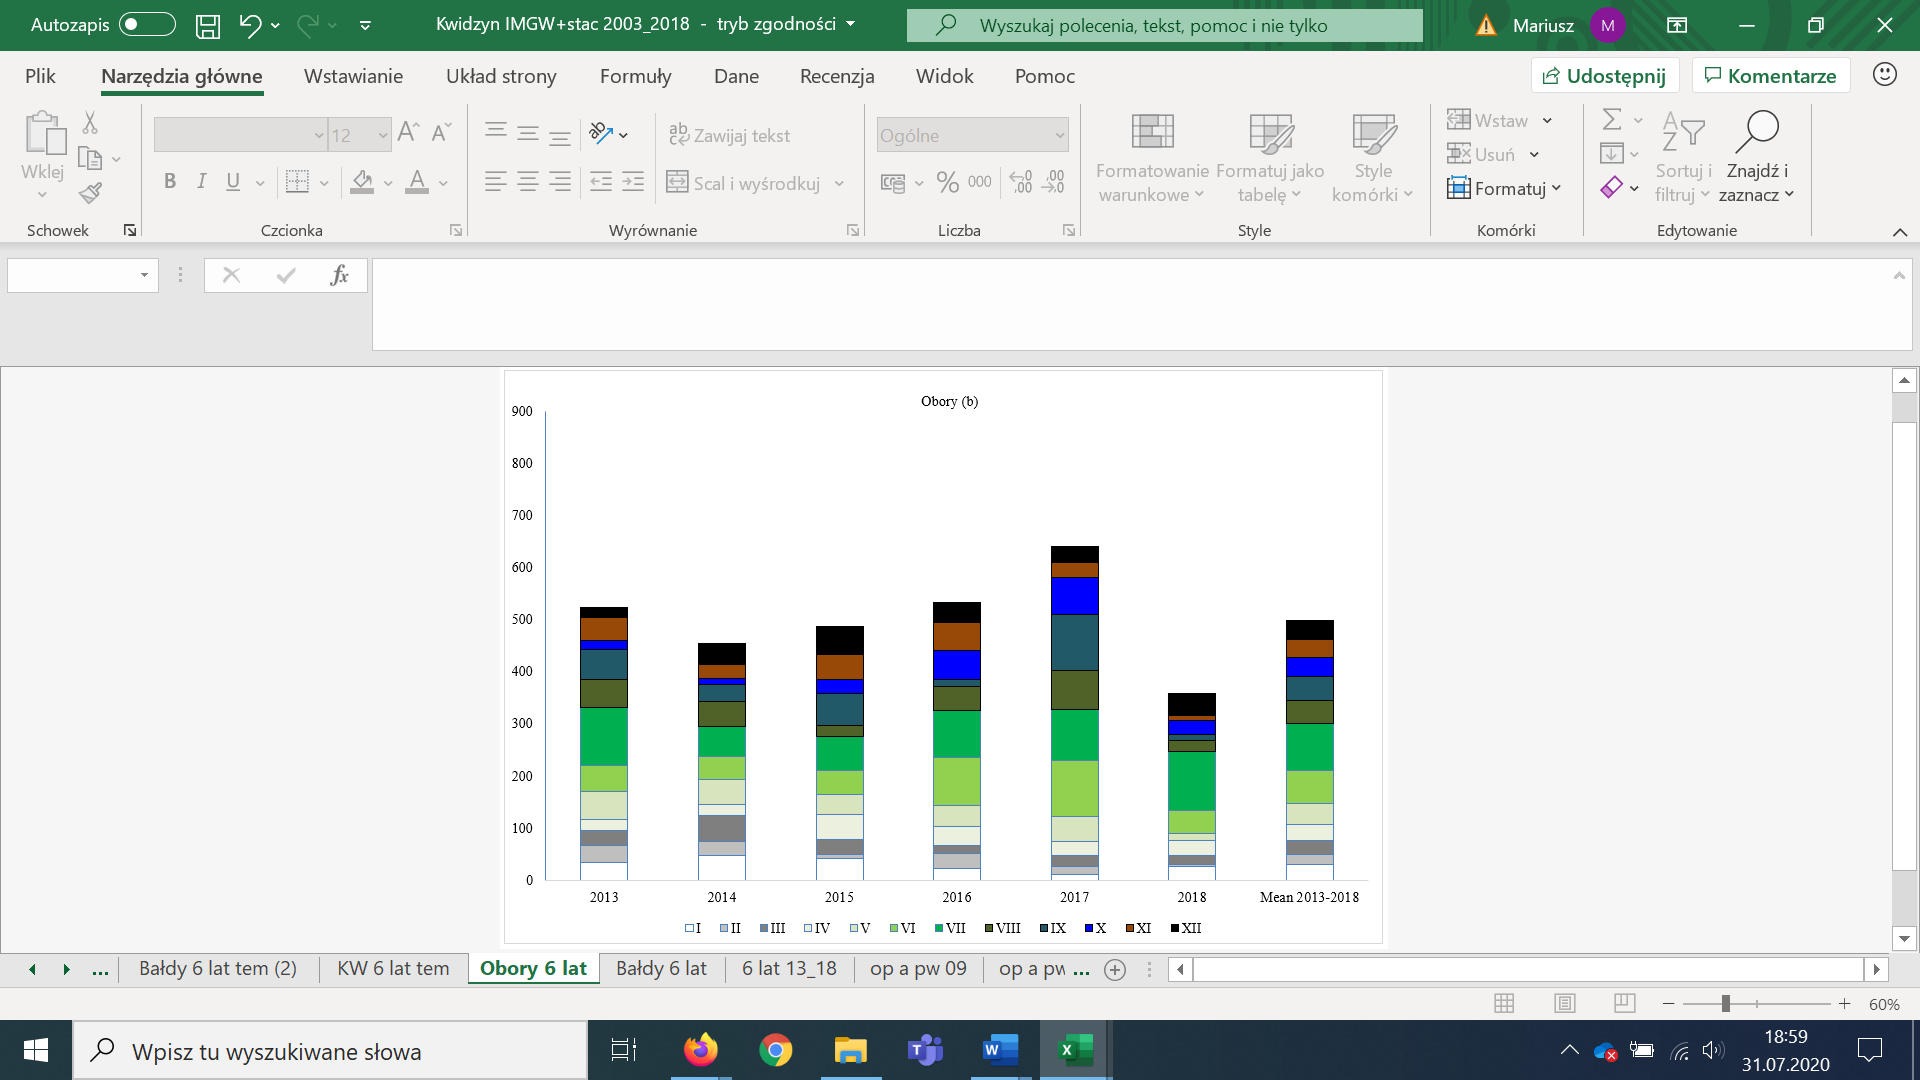


**Figure S1.** Monthly precipitation (mm) in the years of the experiment at two sites Bałdy (a) and Obory (b) and mean value for years 2013-2018.
